# Supplementary material for: Mouse N2a Neuroblastoma Assay: Uncertainties and Comparison with Alternative Cell-Based Assays for Ciguatoxin Detection
Source: MDPI journal article supplement (doi:10.3390/md21110590), 2023-11-13
Supplement: s1 [file s1]

## Table of Contents

|    |                |   |
|----|----------------|---|
| 1. | Figure S1..... | 2 |
| 2. | Figure S2..... | 3 |
| 3. | Figure S3..... | 4 |
| 4. | Figure S4..... | 5 |
| 5. | Figure S5..... | 5 |

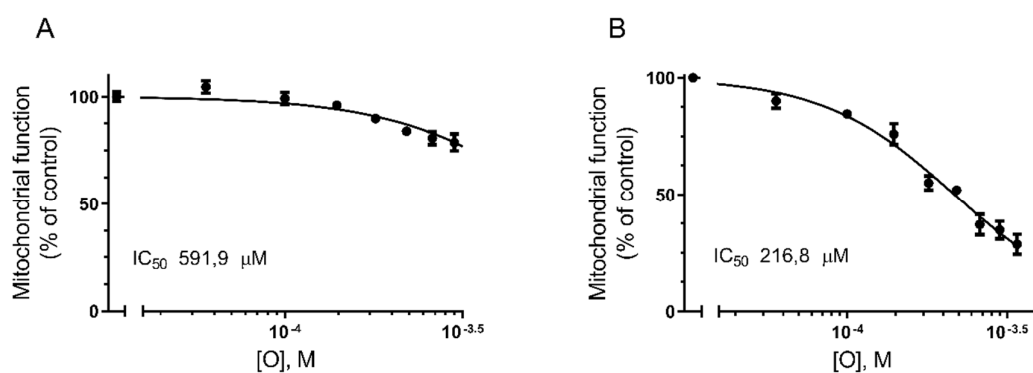

**Figure S1:** Cytotoxic effects of O and O/V combinations in N2a cells. A. Concentration response effect of 24 h exposure of cells to increasing O concentrations. B. Concentration response effect of 24 h exposure of cells to increasing O and V concentrations (60/6, 100/10, 140/14, 180/18, 220/22, 260/26, 300/30, 340/34 μM O/V).

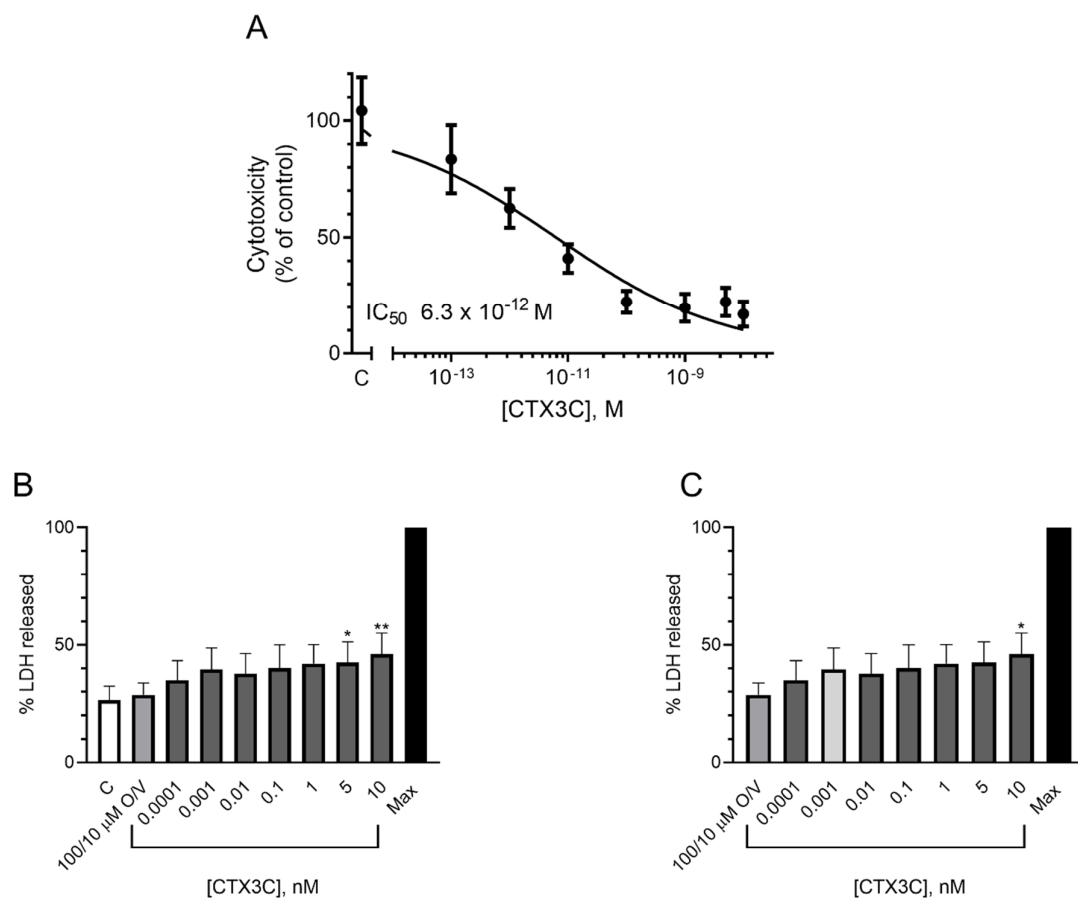

**Figure S2:** Cytotoxic effects of O/V and increasing CTX3C concentrations in N2a cells cultured in the presence of 5 % FBS and treated with the different compounds in the presence of 2 % FBSA. A. Concentration response effect of 24 h exposure of cells to increasing CTX3C concentrations and 100/10  $\mu$ M O/V evaluated by the MTT assay. B. Absence of cytotoxic effects of O/V and increasing CTX3C concentrations in N2a cells evaluated by the LDH assay in contrast to control conditions. C. Absence of cytotoxic effects of O/V and increasing CTX3C concentrations in N2a cells evaluated by LDH assay in contrast to 100/10  $\mu$ M O/V conditions. Cell viability data are expressed as percentage of untreated control cells, mean  $\pm$  SEM of three independent experiments and cell. \* $p \leq 0.05$ . \*\* $p \leq 0.01$ .

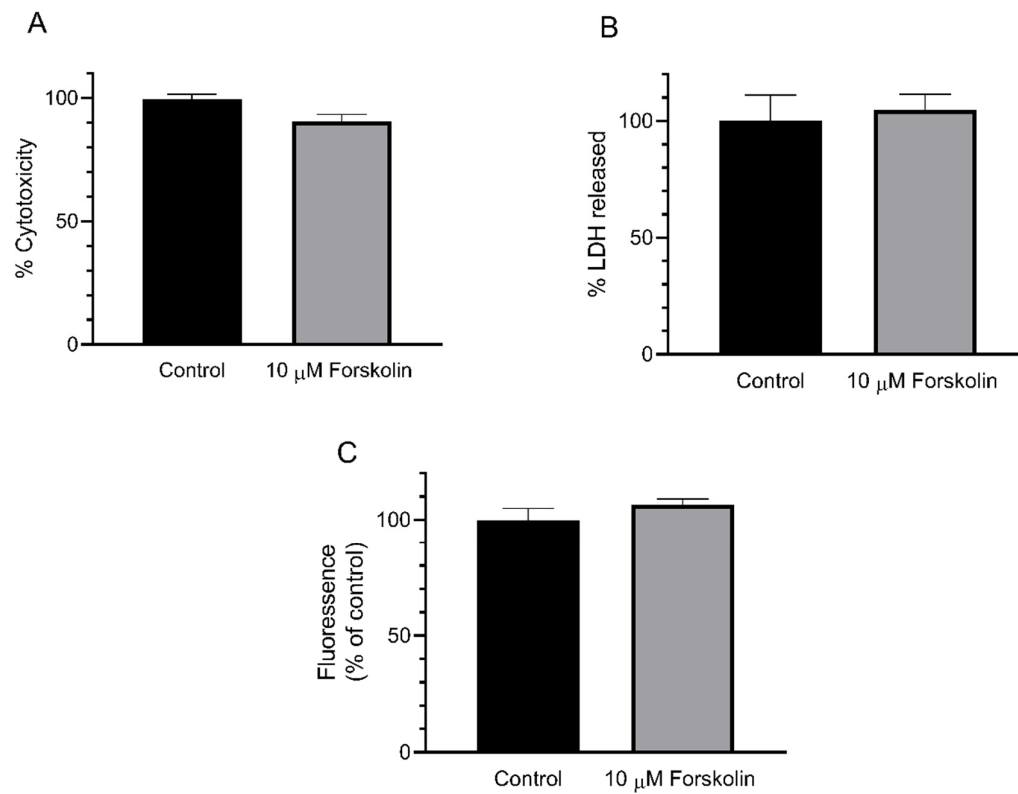

**Figure S3:** No cytotoxic effects of 24 h incubation with 10  $\mu$ M forskolin evaluated by A. MTT assay. B. LDH assay. C. Alamar blue assay in the N2a cell line.

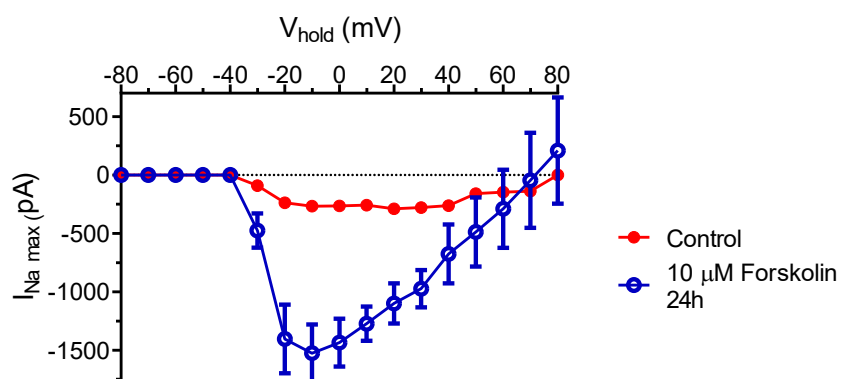

**Figure S4:** Current-voltage relationship of sodium currents in SH-SY5Y cells. Control cells (red) showed a maximum peak inward current of about  $-300$  pA while cells seeded with  $10$   $\mu$ M Forskolin and maintained  $24$  h showed an increase on maximum sodium current intensity up to  $-1500$  pA.

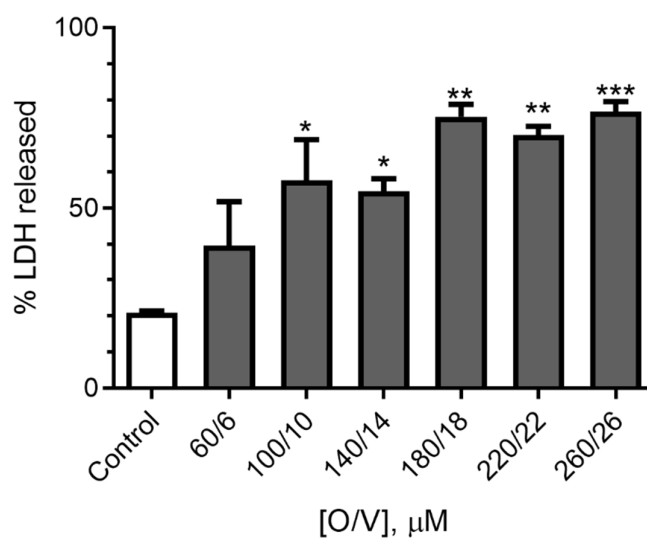

**Figure S5:** Cytotoxic effects in SH-SY5Y cells of different O/V concentrations after  $24$  h treatment.
